# Supplementary material for: Syntheses, DNA interactions, and photodynamic antimicrobial properties of near-infrared indolium carbocyanine dyes
Source: Royal Society of Chemistry journal article supplement (doi:10.1039/d6ra01566b), 2026-04-27
Supplement: d6ra01566b1.pdf [file d6ra01566b1.pdf]

## *Supporting information*

### **Syntheses, DNA interactions, and photodynamic antimicrobial properties of near-infrared indolium carbocyanine dyes**

**Carine P. Seudieu Seudieu,<sup>a</sup> Güliz Ersoy Özmen,<sup>†a</sup> Imran Khan,<sup>†a</sup> Maged Henary<sup>\*ab</sup> and Kathryn B. Grant<sup>\*ab</sup>**

<sup>a</sup>Department of Chemistry, Georgia State University, <sup>b</sup>Center for Diagnostics and Therapeutics, Georgia State University Atlanta, Georgia, United States

<sup>†</sup> These authors contributed equally to this work.

#### **Contents:**

|                                                                                                               |     |
|---------------------------------------------------------------------------------------------------------------|-----|
| <b>Fig. S1.</b> Chemical structures of dyes <b>9</b> , <b>10</b> , indocyanine green, and methylene blue..... | S3  |
| <b>Synthetic Methods.</b> Precursor compounds <b>1</b> through <b>8</b> .....                                 | S4  |
| <b>Fig. S2.</b> <sup>1</sup> H NMR spectrum of dye <b>9</b> .....                                             | S5  |
| <b>Fig. S3.</b> <sup>13</sup> C NMR spectrum of dye <b>9</b> .....                                            | S6  |
| <b>Fig. S4.</b> High Resolution ESI mass spectrum of dye <b>9</b> .....                                       | S7  |
| <b>Fig. S5.</b> <sup>1</sup> H NMR spectrum of dye <b>10</b> .....                                            | S8  |
| <b>Fig. S6.</b> <sup>13</sup> C NMR spectrum of dye <b>10</b> .....                                           | S9  |
| <b>Fig. S7.</b> High Resolution ESI mass spectrum of dye <b>10</b> .....                                      | S10 |
| <b>Fig. S8.</b> UV-visible spectra vs. time of indocyanine green and methylene blue.....                      | S11 |

|                                                                                                                                                |     |
|------------------------------------------------------------------------------------------------------------------------------------------------|-----|
| <b>Fig. S9.</b> UV-visible spectra: $1.0 \times 10^{-6}$ to $1.0 \times 10^{-5}$ M of dyes <b>9</b> and <b>10</b> in DMSO; linear regression.. | S12 |
| <b>Fig. S10.</b> Dye absorption in DMSO: $\lambda_{\max}$ / absorption at hypsochromic shoulder.....                                           | S13 |
| <b>Fig. S11.</b> UV-visible spectra: $1.0 \times 10^{-6}$ to $5.0 \times 10^{-6}$ M of dyes <b>9</b> and <b>10</b> in DMSO; linear regression  | S14 |
| <b>Fig. S12.</b> DNA photocleavage without and with chemical additives: dye <b>10</b> .....                                                    | S15 |
| <b>Fig. S13.</b> Dye <b>10</b> fluorescence emission spectra .....                                                                             | S16 |
| <b>Fig. S14.</b> UV-visible spectra of dye <b>10</b> , and/or pentamidine/methyl green.....                                                    | S17 |
| <b>References</b> .....                                                                                                                        | S17 |

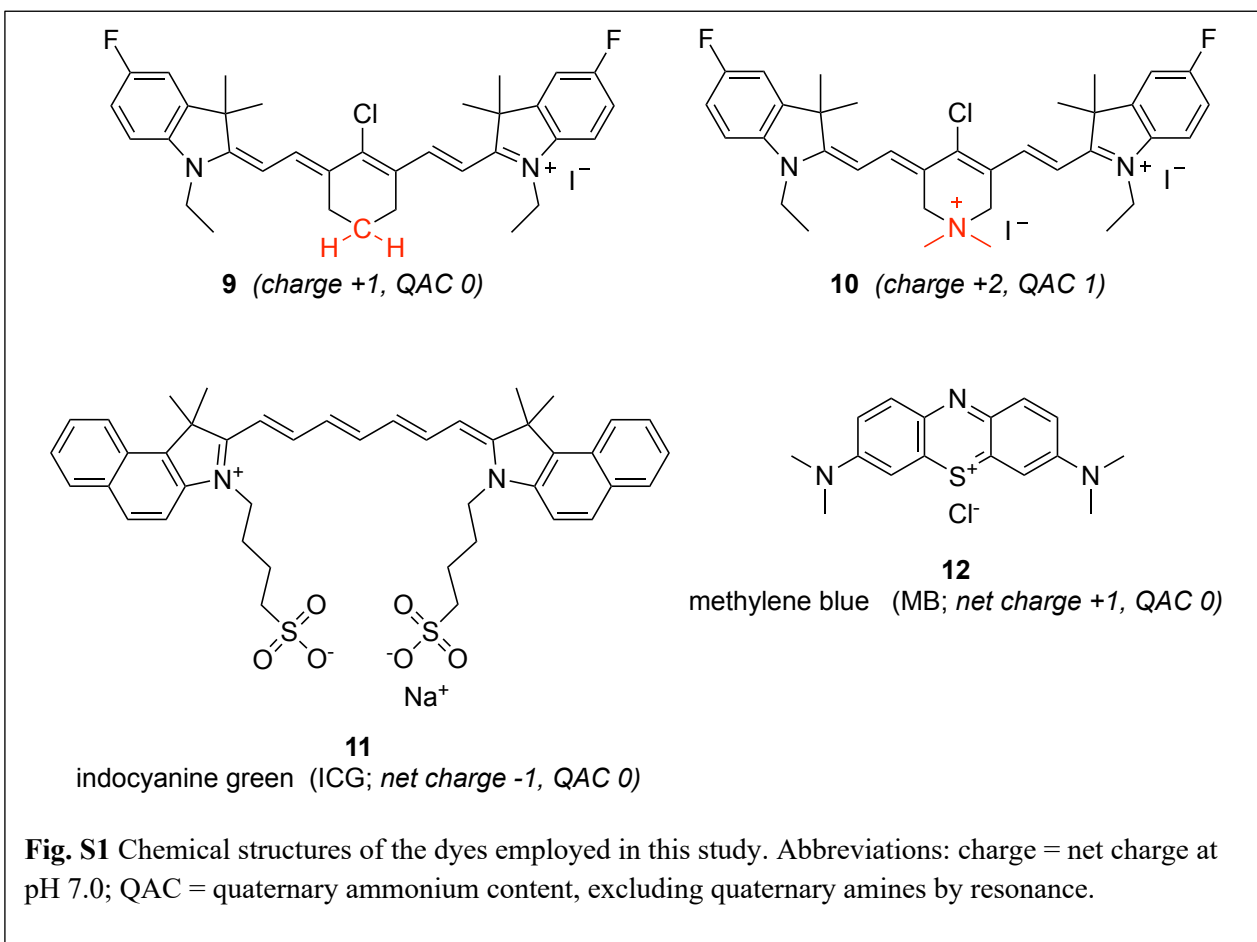

**Fig. S1** Chemical structures of the dyes employed in this study. Abbreviations: charge = net charge at pH 7.0; QAC = quaternary ammonium content, excluding quaternary amines by resonance.

## Synthetic Procedures: Precursor Compounds **1** through **8** in Scheme 1

**5-fluoro-2,3,3-trimethyl-3H-indole (2).** Known compound **2** was prepared according to a reported procedure.<sup>1,2</sup> A solution of commercially available 4-fluorophenylhydrazine (**1**) 15 g (92.3 mmol) and 3-methyl-2-butanone (14.8 mL, 138.4 mmol) in acetic acid (200 mL) was reflux overnight. The solution was then cooled to room temperature and filtered. The solvent was removed under reduced pressure, and the remaining dark-brown residue was dissolved in DCM. The resulting solution was extracted cautiously with NaHCO<sub>3</sub> solution (2 times), then washed with water and brine, dried with MgSO<sub>4</sub>, and concentrated under vacuum to obtain product **2**. Yield: 76 % (16.0 g).

**1-ethyl-5-fluoro-2,3,3-trimethyl-3H-indol-1-ium iodide (3).**<sup>3</sup> Iodoethane was added to 5-fluoro-2,3,3-trimethyl-3H-indole (**2**) in acetonitrile under reflux conditions. The reaction mixture was stirred for 18 h at 85 °C to afford product as a precipitate (**3**). Then, the precipitate was filtered under vacuum and washed with ether to yield the product.

**1,1-dimethyl-4-oxopiperidin-1-ium iodide (6).** Known compound **6** was prepared according to the reported procedure.<sup>2,7</sup> Compound **5** was stirred in acetone and excess iodomethane was added. The mixture was stirred at rt for 8 h, while monitoring the reaction progress by TLC. After the reaction was completed, the mixture was filtered, and the white precipitate was washed with acetone and ether. The product **6** was dried under vacuum and used directly in next step without further purification.

**(E)-2-chloro-3-(hydroxymethylene)cyclohex-1-ene-1-carbaldehyde (7).** Known compound **7** was prepared according to a reported procedure.<sup>4,5</sup> POCl<sub>3</sub> (9 mL, 96 mmol) in DCM (1 mL) was added dropwise to a chilled solution of 1:1 DMF:DCM (10 mL each) in an ice bath. The mixture was stirred for 30 min, then commercially available cyclohexanone (**4**) (4.45 mL, 43 mmol) was added. The resulting solution was refluxed for 3 h at 80 °C, cooled, and poured into ice cold H<sub>2</sub>O. The mixture was kept overnight in a 4 °C refrigerator to obtain product **7**. Yield: 70 %.

**(E)-4-chloro-5-formyl-3-(hydroxymethylene)-1,1-dimethyl-1,2,3,6-tetrahydropyridin-1-ium (8).** Known compound **8** was prepared according to a reported method as follows.<sup>2,6</sup> DMF was cooled down (9.0 mL, 0.12 mol) to 0 °C and POCl<sub>3</sub> was slowly added (5.5 mL, 0.06 mol) to the reaction mixture, which was stirred at 0 °C for 30 min. Then, compound **6** (5.00 g) was transferred to the reaction and the resulting the solution was heated at 80 °C for 3 h. The mixture was cooled down, then aqueous hydrochloric acid (20 % v/v, 30.0 mL) was added dropwise and stirred at room temperature for 1 h. The solution was sonicated for 20 min and left to stand in freezer overnight (-20 °C). The precipitated product was subsequently filtered to afford **8**. Yield: 25 %.

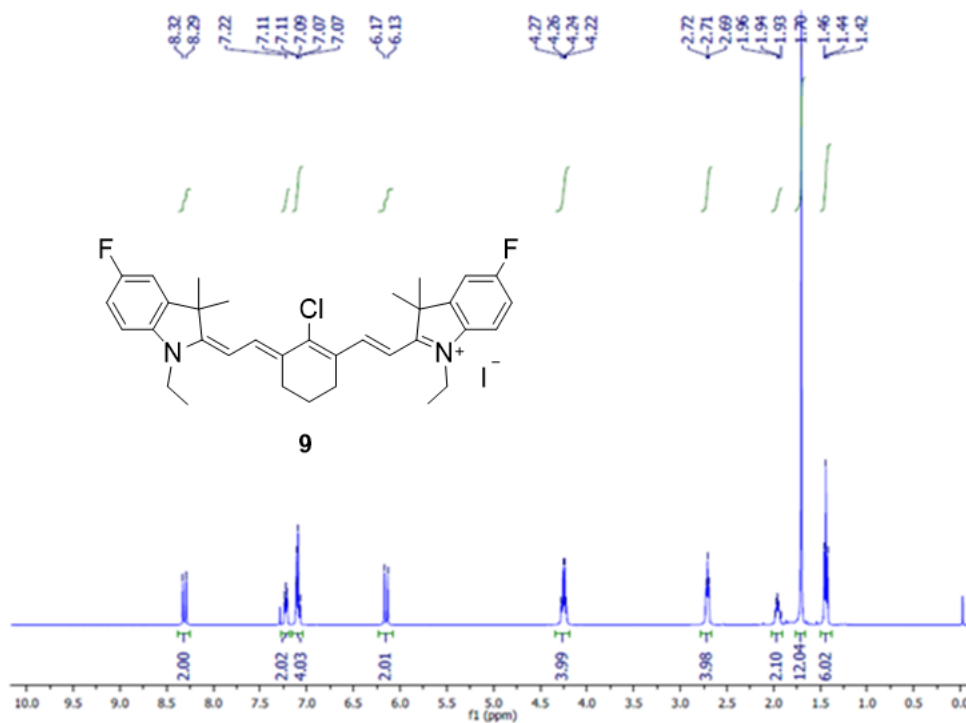

**Fig S2**  $^1\text{H}$  NMR spectrum of dye **9** (400 MHz,  $\text{CDCl}_3$ ):  $\delta$  8.31 ppm (d,  $J = 14.1$  Hz, 2H), 7.22 (dd,  $J = 9.5$ , 3.7 Hz, 2H), 7.09 (t,  $J = 7.6$  Hz, 4H), 6.14 (d,  $J = 14.1$  Hz, 2H), 4.24 (q,  $J = 7.1$  Hz, 4H), 2.70 (t,  $J = 6.0$  Hz, 4H), 2.01 – 1.90 (m, 2H), 1.70 (s, 12H), 1.44 (t,  $J = 7.2$  Hz, 6H).

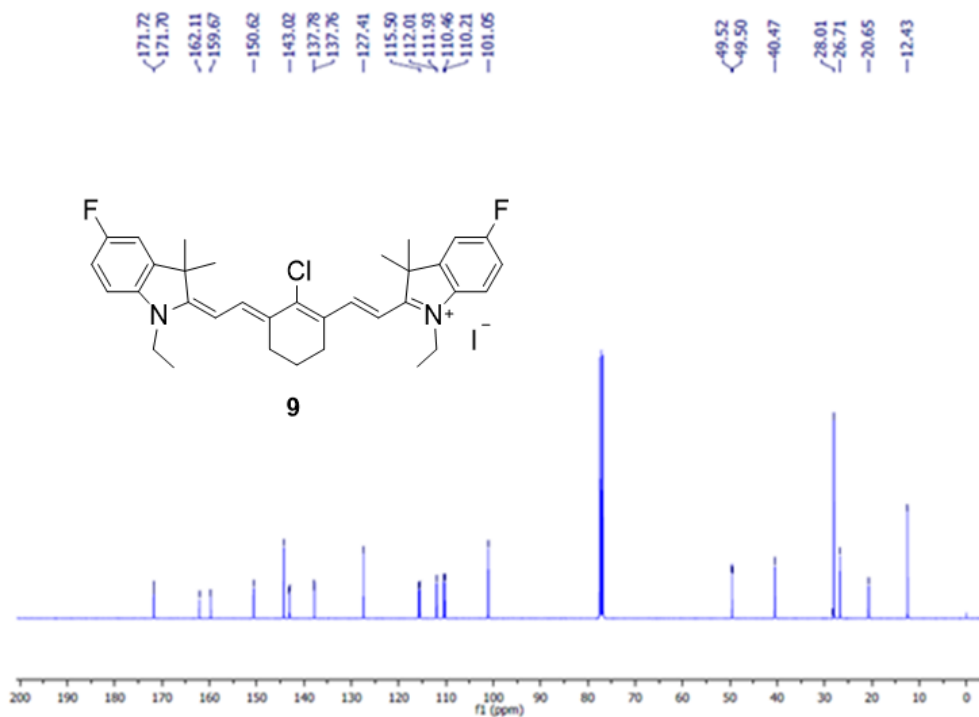

**Fig S3**  $^{13}\text{C}$  NMR spectrum of dye **9** (101 MHz,  $\text{CDCl}_3$ ):  $\delta$  ppm 171.72, 171.70, 162.11, 159.67, 150.62, 144.26, 143.10, 143.02, 137.78, 137.76, 127.41, 115.74, 115.50, 112.01, 111.93, 110.46, 110.21, 101.05, 49.52, 49.50, 40.47, 28.01, 26.71, 20.65, 12.43.

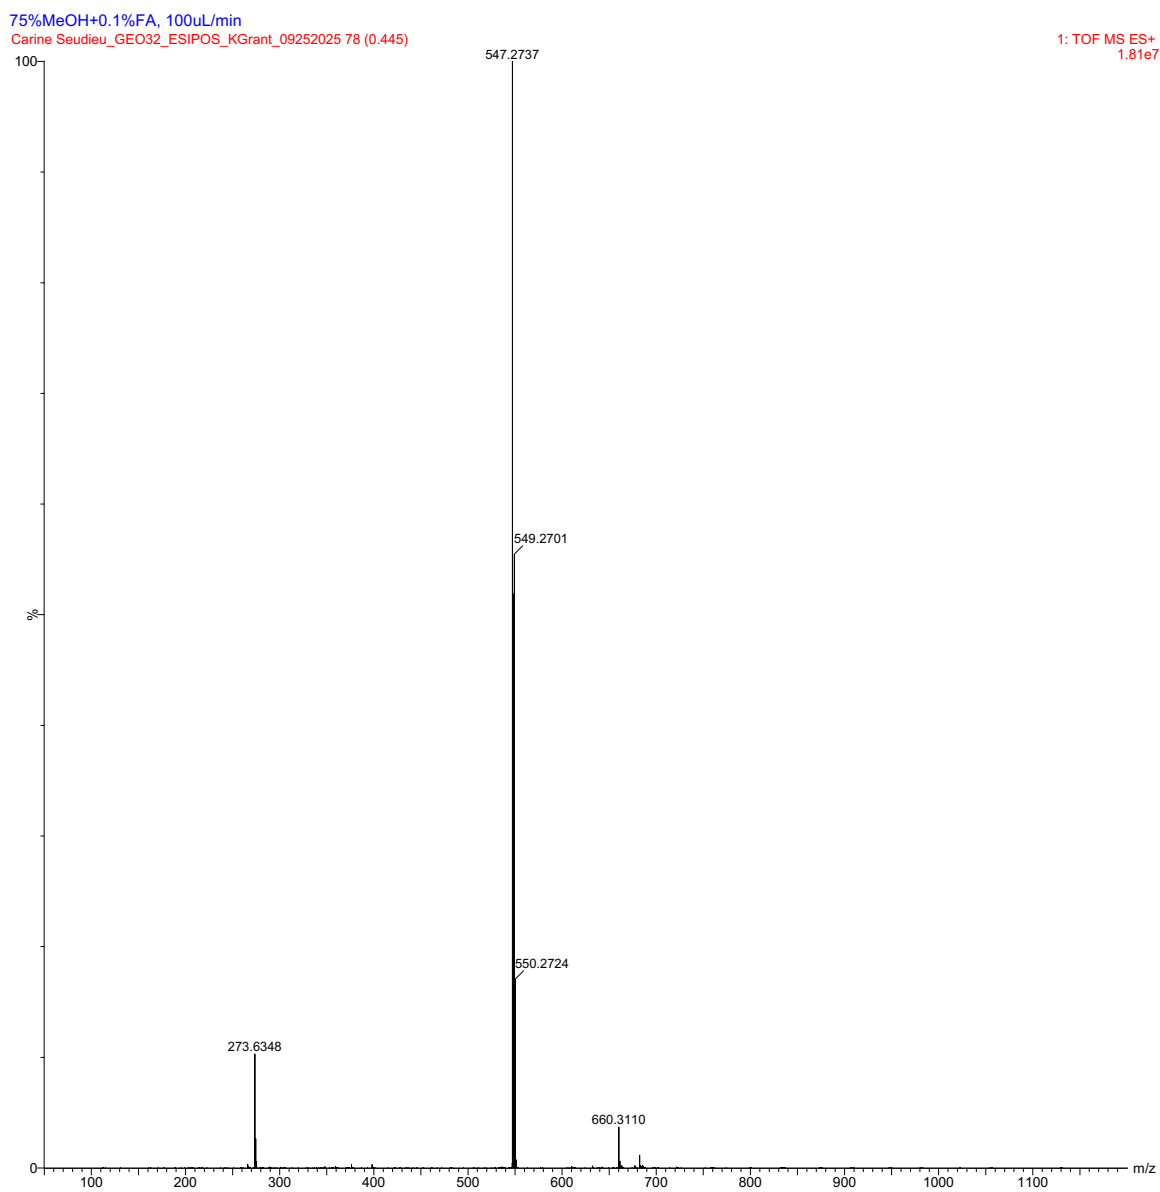

**Fig S4** High Resolution ESI mass spectrum of dye **9** (positive mode) calculated for  $C_{34}H_{38}ClF_2N_2^+$ :  $m/z$  547. 2692, found  $m/z$  547.2737.

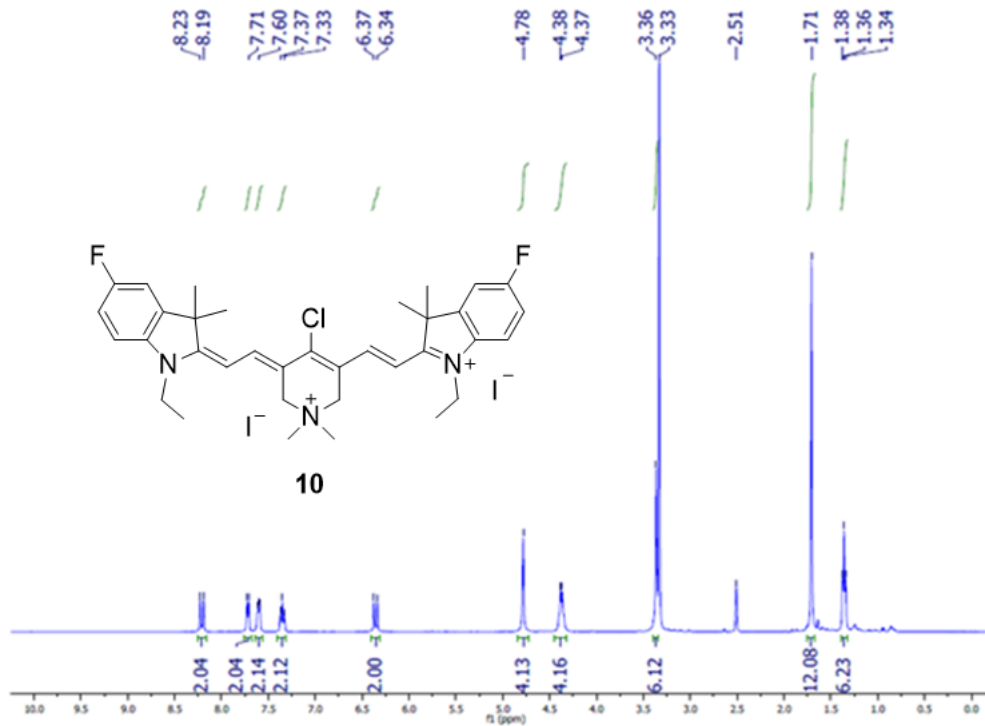

**Fig S5** <sup>1</sup>H NMR spectrum of dye **10** (400 MHz, DMSO-*d*<sub>6</sub>):  $\delta$  8.21 ppm (d,  $J$  = 14.6 Hz, 2H), 7.72 (d,  $J$  = 8.1 Hz, 2H), 7.64 – 7.56 (m, 2H), 7.35 (t,  $J$  = 8.9 Hz, 2H), 6.36 (d,  $J$  = 14.7 Hz, 2H), 4.78 (s, 4H), 4.37 (d,  $J$  = 6.9 Hz, 4H), 3.36 (s, 6H), 1.71 (s, 12H), 1.36 (t,  $J$  = 6.8 Hz, 6H).

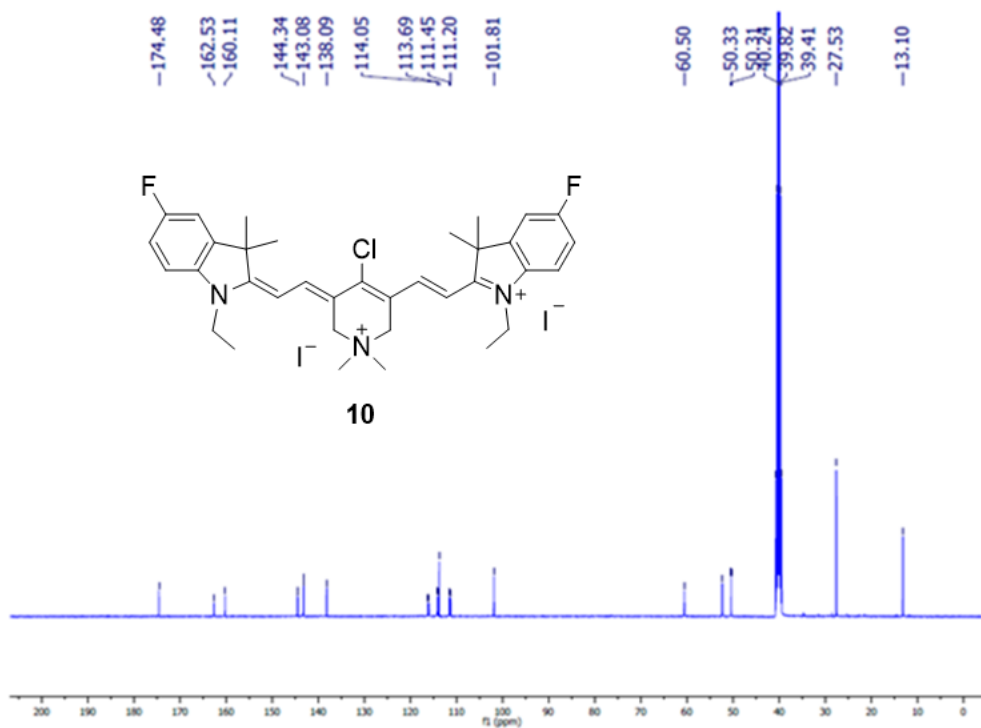

**Fig S6**  $^{13}\text{C}$  NMR spectrum of dye **10** (100 MHz,  $\text{DMSO-}d_6$ ):  $\delta$  ppm 174.48, 162.53, 160.11, 144.43, 144.34, 143.12, 143.08, 138.09, 116.13, 115.88, 114.05, 113.96, 113.69, 111.45, 111.20, 101.81, 60.50, 52.25, 50.33, 50.31, 27.53, 13.10.

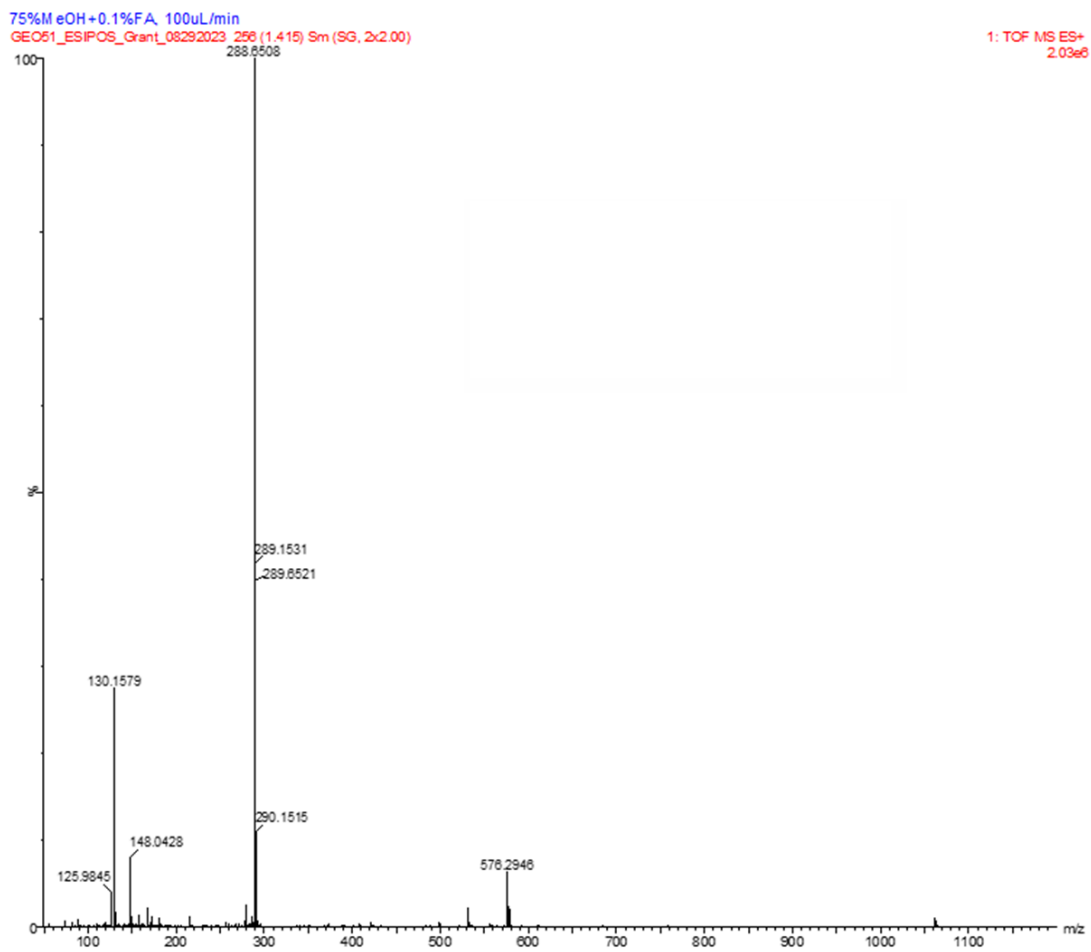

**Fig S7** High Resolution ESI mass spectrum of dye **10** (positive mode) calculated for  $C_{35}H_{42}ClF_2N_3^{2+}$ :  $m/z$  288.65, found  $m/z$  288.6508.

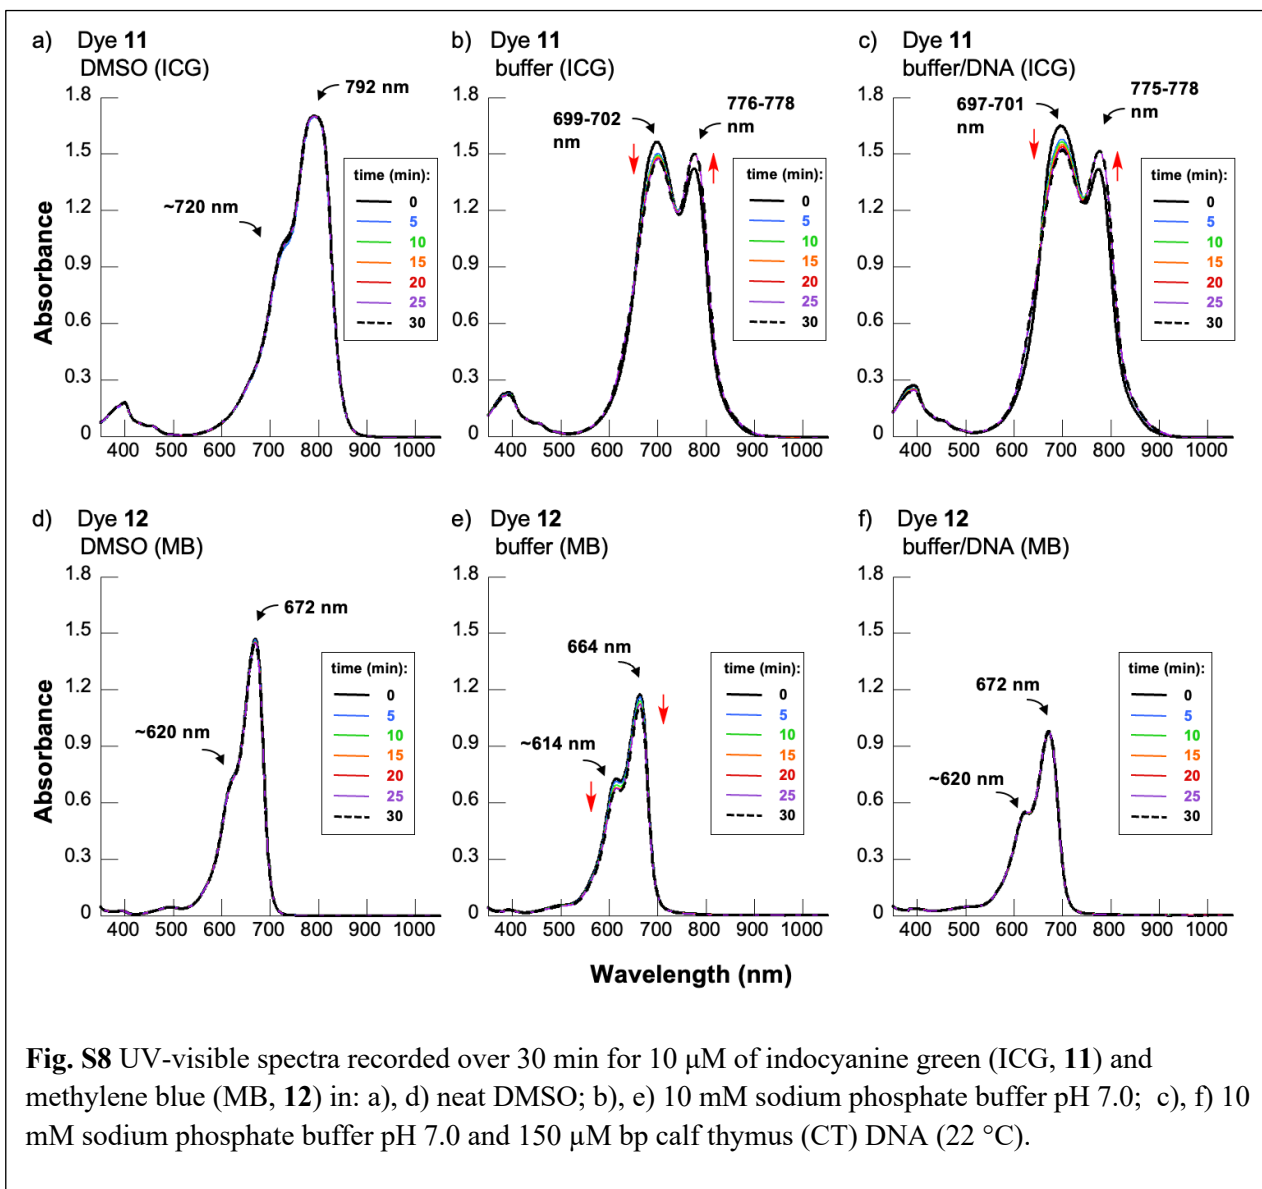

a) Dye 9 in DMSO

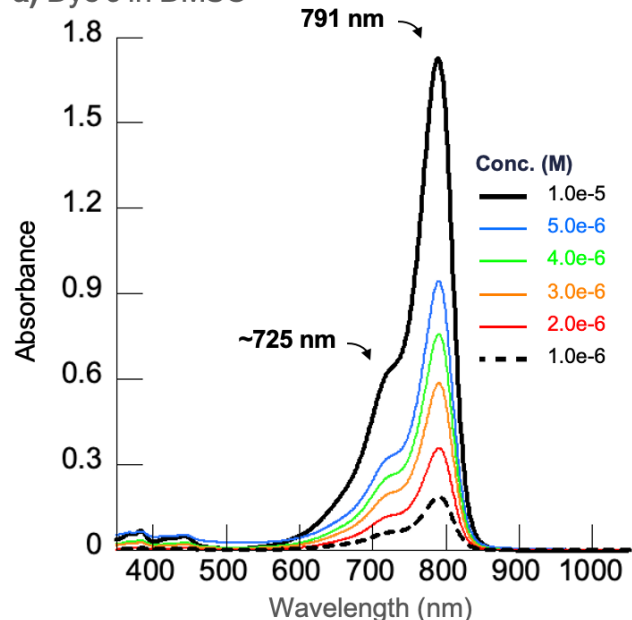

b) Dye 9 Beer's Law plot 791 nm

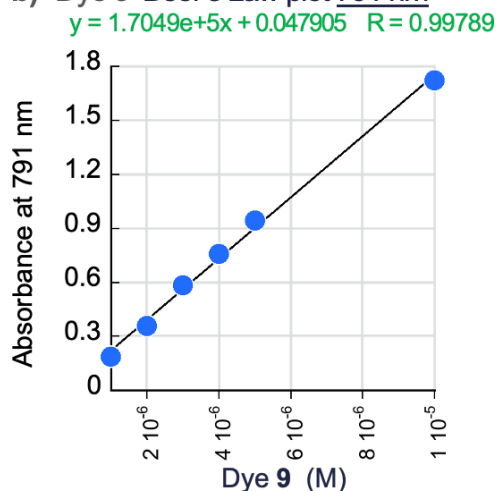

c) Dye 10 in DMSO

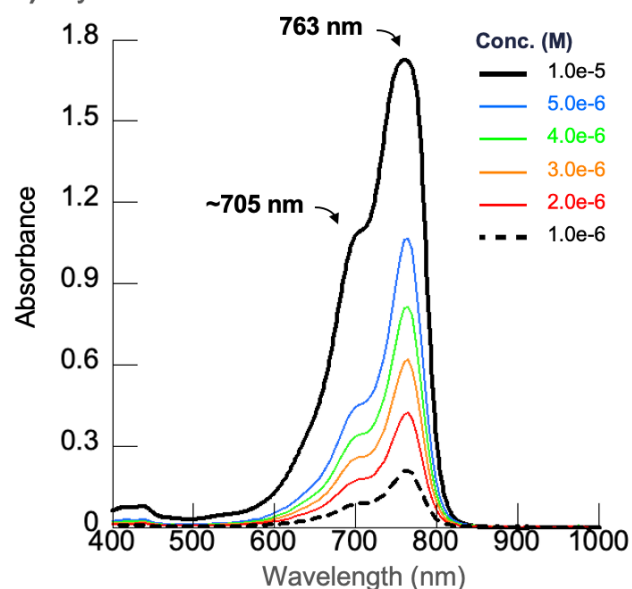

d) Dye 10 Beer's Law plot 763 nm

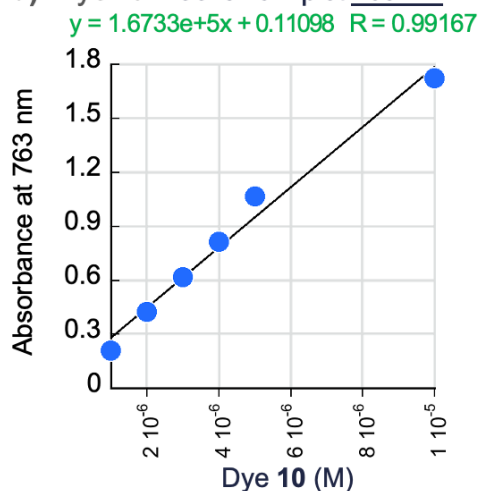

e) Dye 10 Beer's Law plot 705 nm

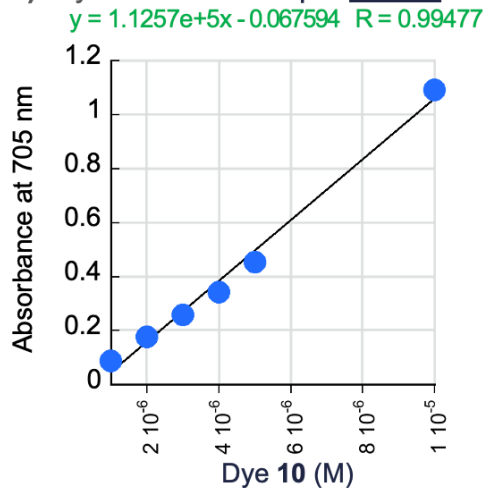

**Fig. S9** UV-visible absorption spectra in neat DMSO and corresponding absorbance values plotted as a function increasing  $1.0 \times 10^{-6}$  to  $1.0 \times 10^{-5}$  M dye concentrations for: **a, b**) dye 9 and **c, d, e**) dye 10. Linear regression analyses (right) were used to fit the  $\lambda_{\max}$  absorbance values to the best straight-line  $y = mx + b$ , where the slope  $m$  represents dye molar extinction coefficient ( $\epsilon_{\lambda_{\max}} = M^{-1}cm^{-1}$ ) in DMSO.

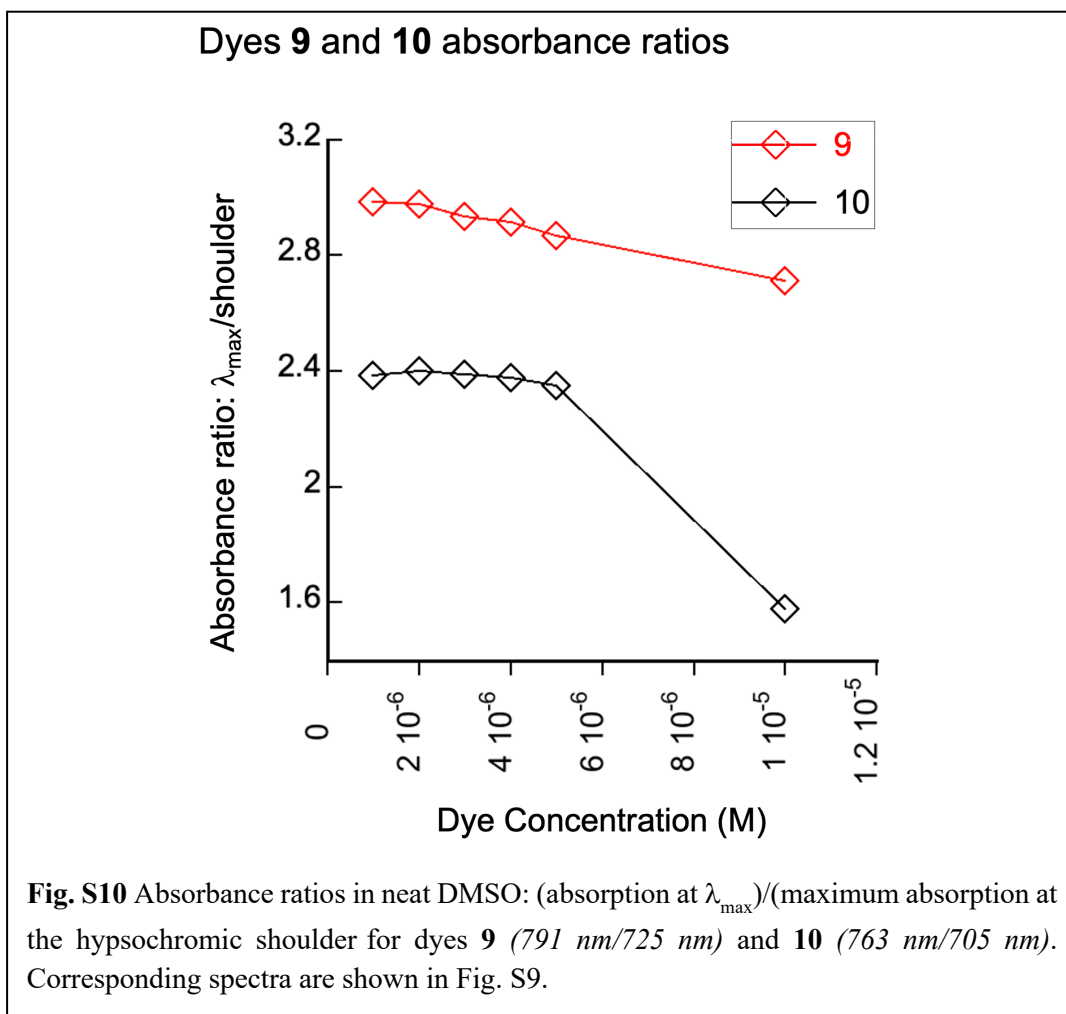

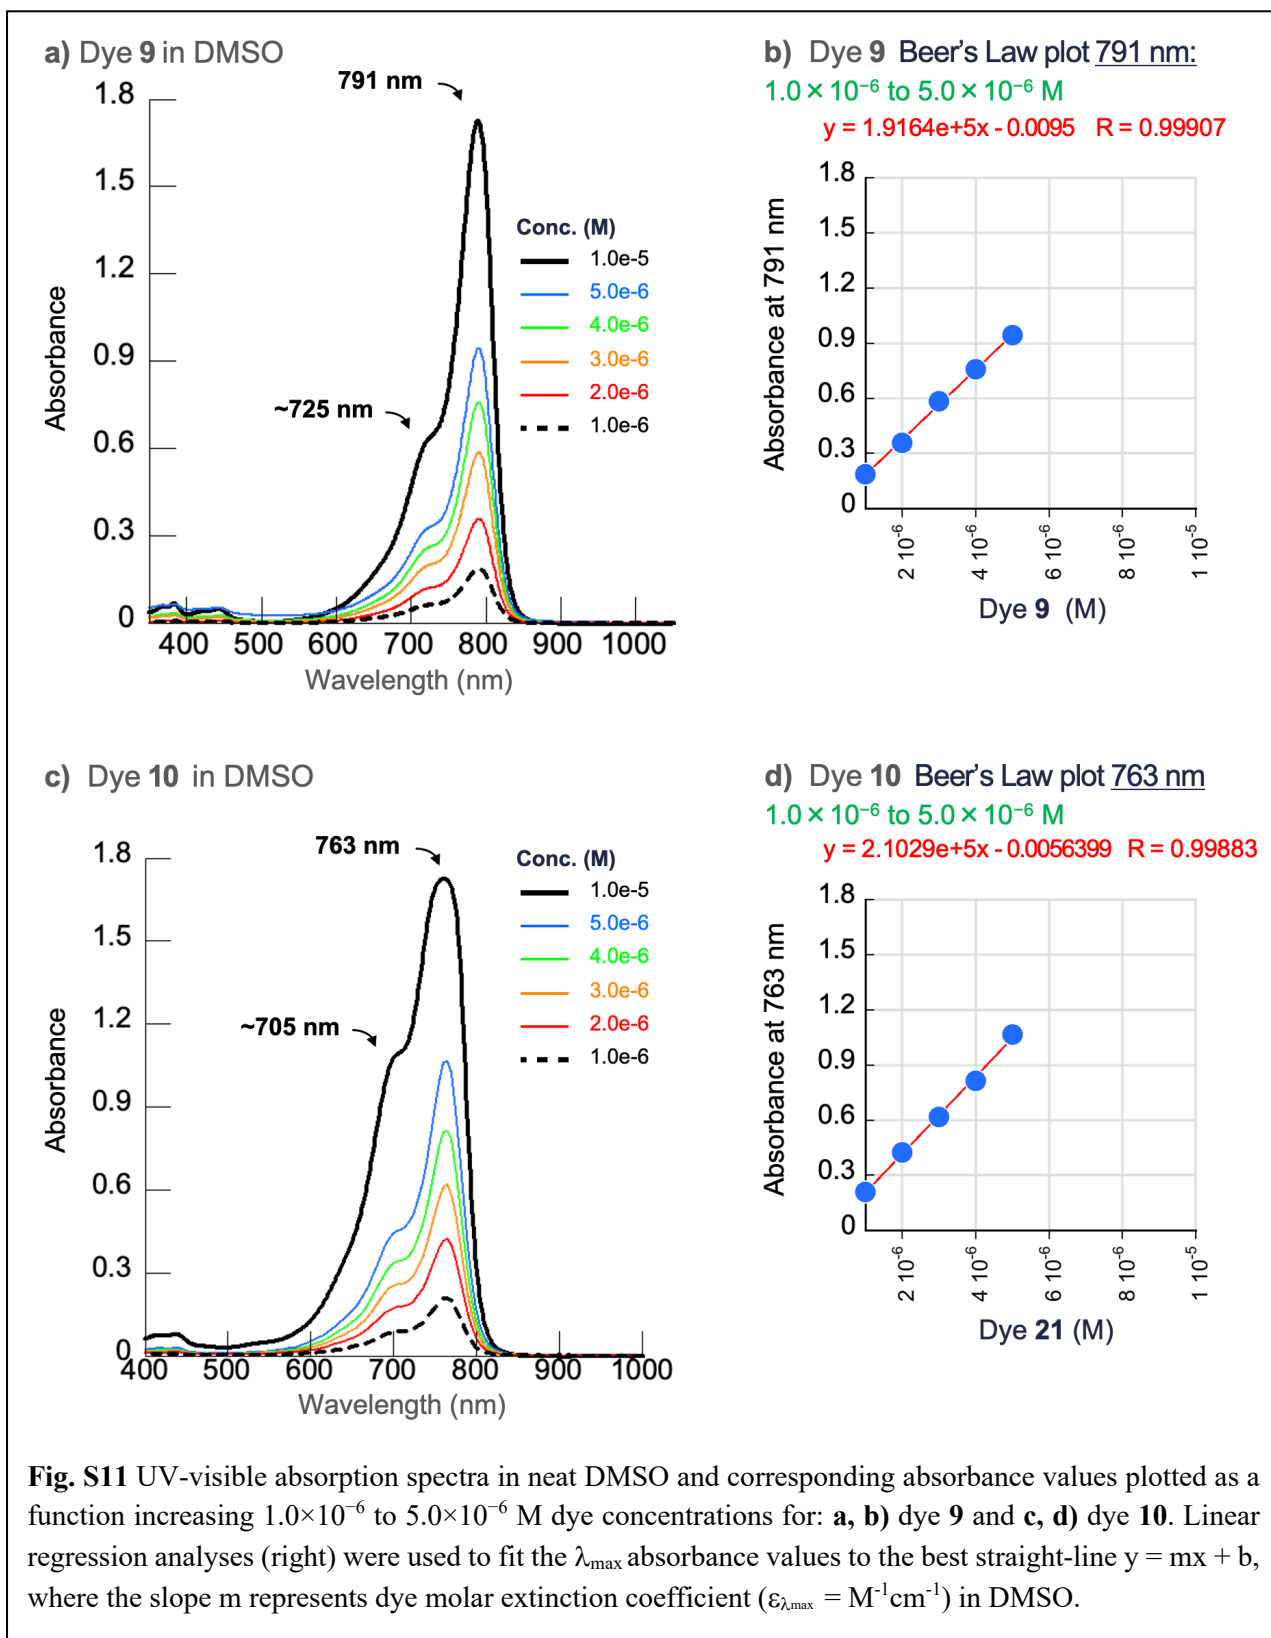

**Dye 10, DNA Cleavage  $\pm$  741 nm  $h\nu$ , SB, EDTA, Tiron, D<sub>2</sub>O:**

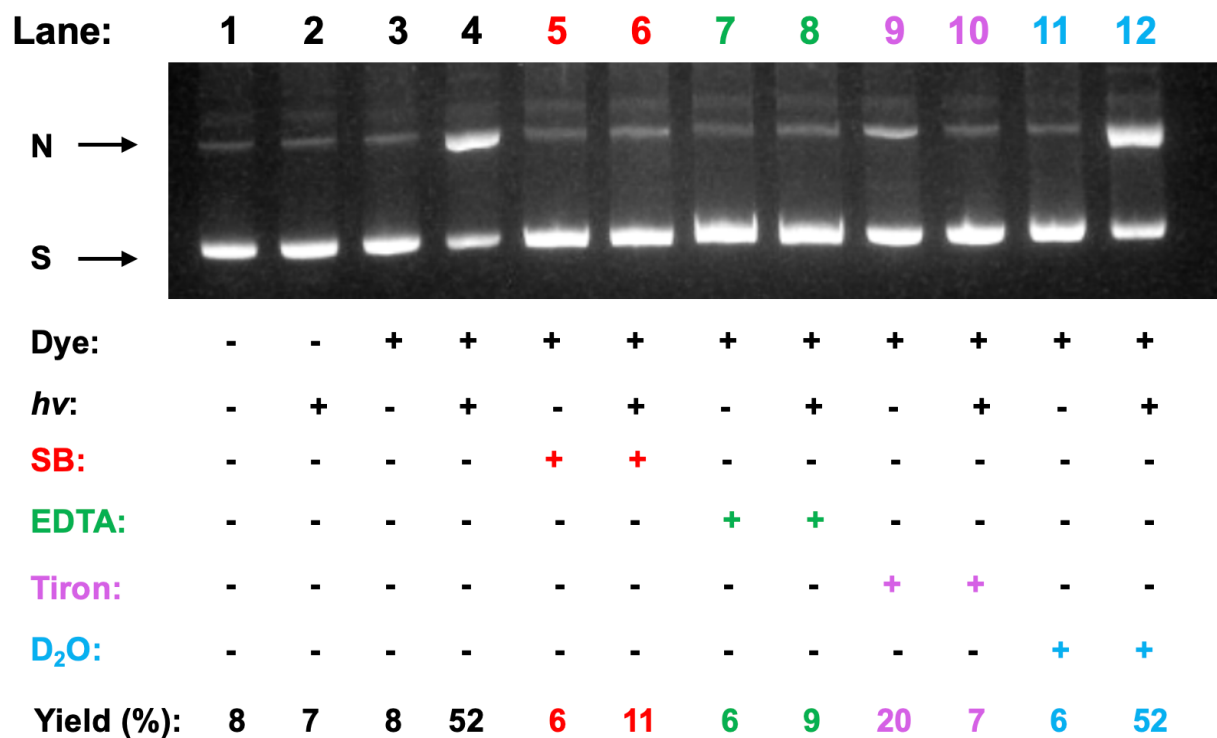

**Fig. S12** Representative trial: agarose gel stained with ethidium bromide showing pUC19 plasmid photocleavage by dye **10**. Reactions contained 10 mM sodium phosphate buffer pH 7.0 and 38  $\mu$ M bp DNA in the absence and presence of 30  $\mu$ M of **10** and a chemical agent, either: 100 mM of sodium benzoate (SB); 100 mM ethylenediaminetetraacetic acid (EDTA), 10 mM Tiron, or 79 % (v/v) of deuterium oxide (D<sub>2</sub>O). Each reaction was irradiated for 30 min with 741 nm LED lamp, 0.3 W/cm<sup>2</sup> or kept in dark (22 °C). (In Table 1 of the main manuscript, photocleavage inhibition percentages for each chemical additive are calculated as the average of three independent trials, with standard deviations representing the error.) Abbreviations: N, nicked; S, supercoiled.

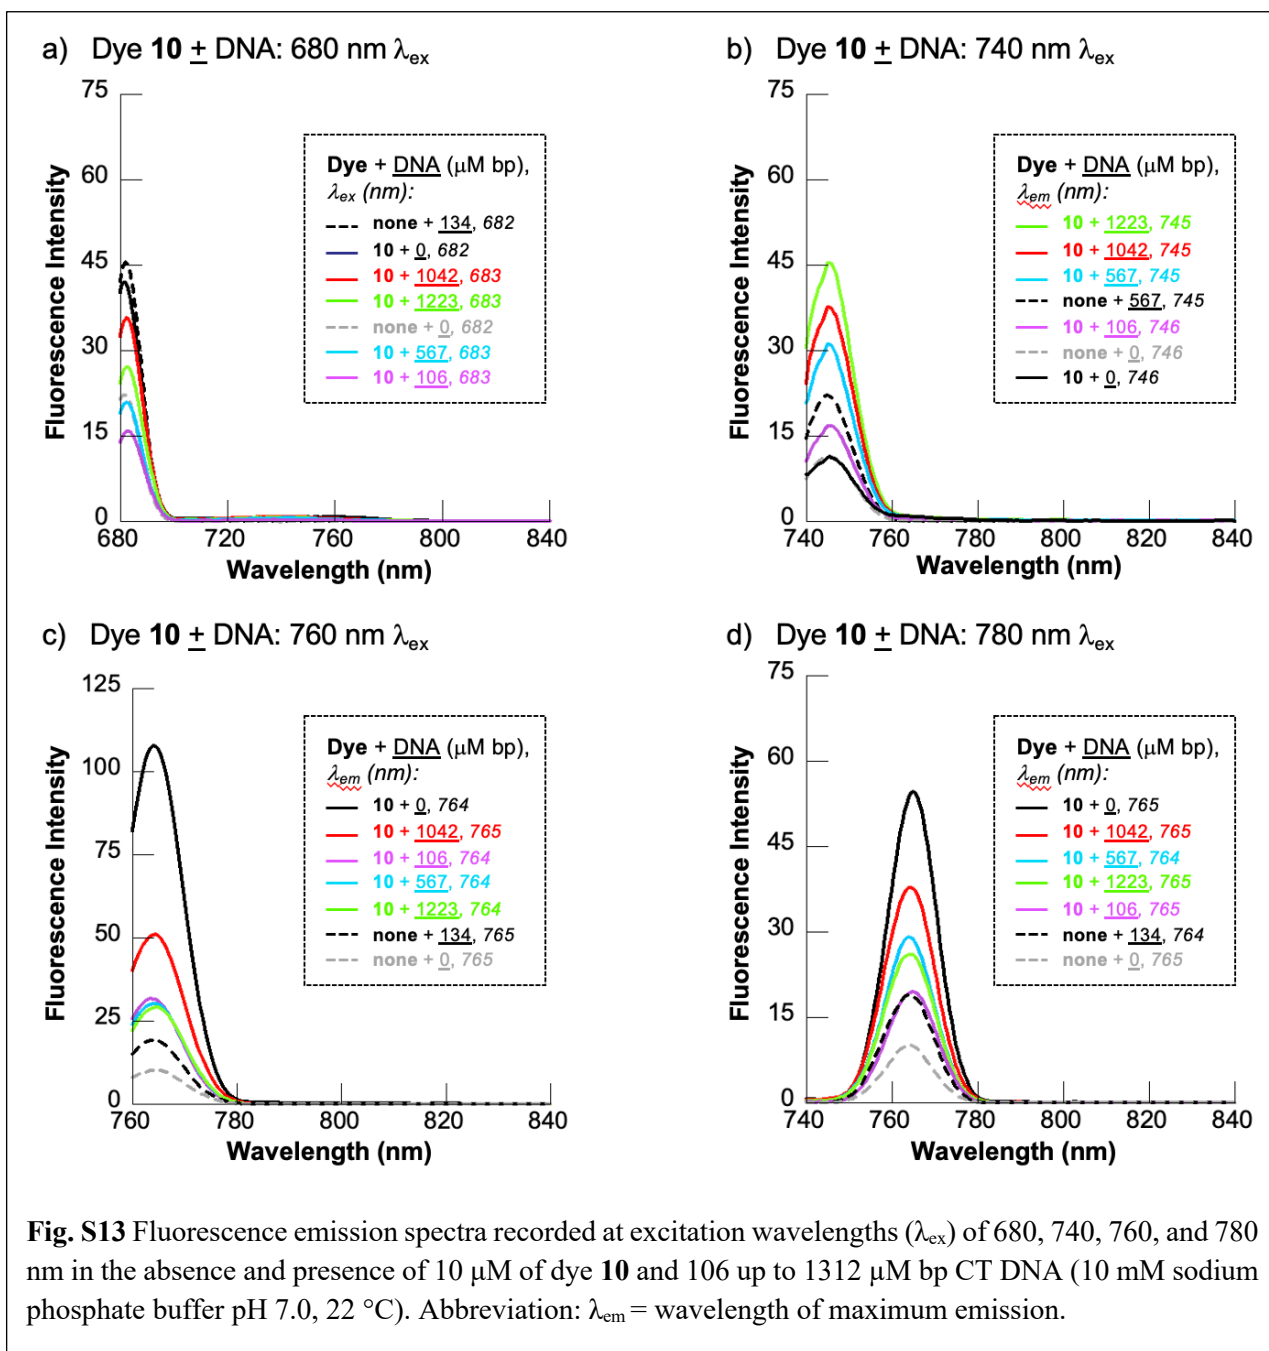

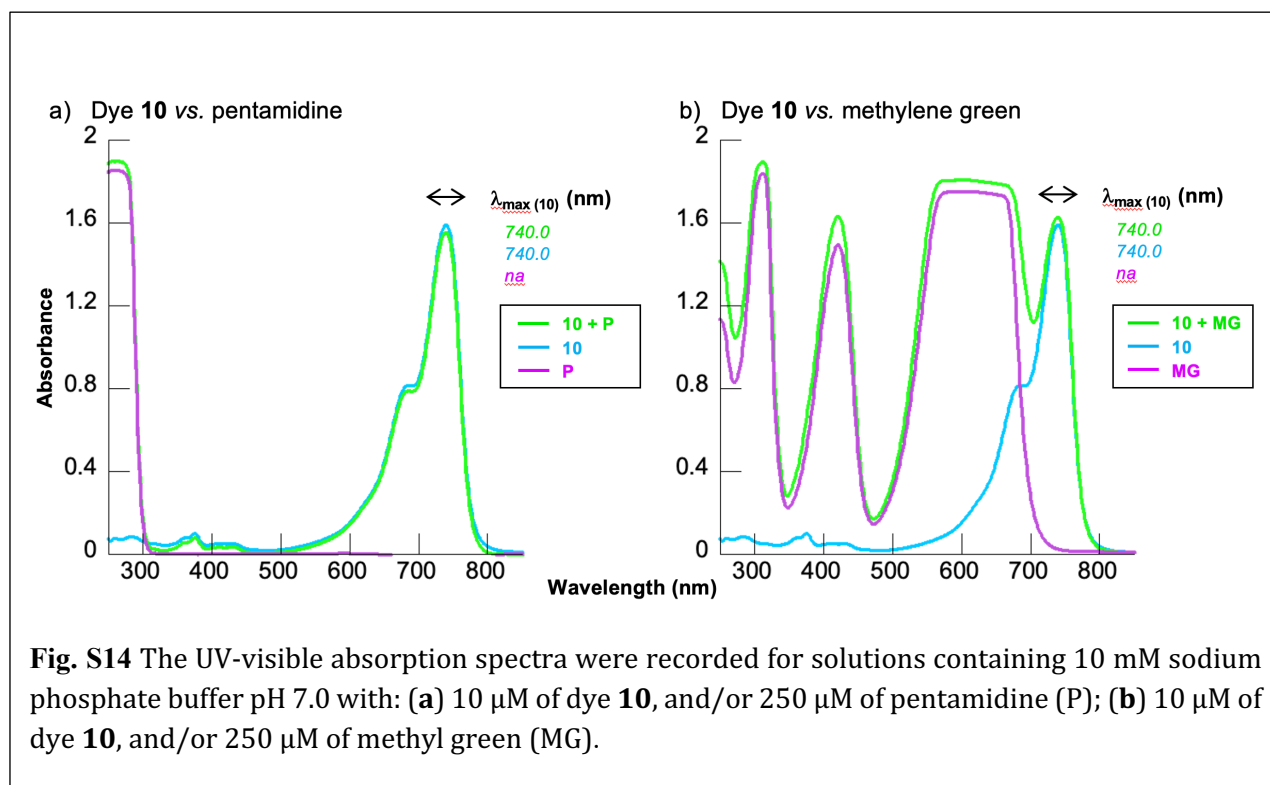

**Fig. S14** The UV-visible absorption spectra were recorded for solutions containing 10 mM sodium phosphate buffer pH 7.0 with: (a) 10  $\mu$ M of dye **10**, and/or 250  $\mu$ M of pentamidine (P); (b) 10  $\mu$ M of dye **10**, and/or 250  $\mu$ M of methylene green (MG).

## References:

1. G. Szalóki and L. Sanguinet, Silica-mediated synthesis of indolinooxazolidine-based molecular switches, *J. Org. Chem.*, 2015, **80**, 3949-3956.
2. H. Kang, S. H. Park, G. Esroy Ozmen, W. Hur, J. Dinh, H. Wang, V. Nguyen, S. Ahn, A. Yamashita, W. S. Stiles, S. Kashiwagi, K. Bao, M. Henrery and H. S. Choi, Cartilage-targeting fluorophores for early detection of arthritis in the NIR-II window, *Chem*, 2025, **11**, 102481.
3. A. St Lorenz, E. R. Buabeng, O. Taratula, O. Taratula and M. Henary, Near-Infrared heptamethine cyanine dyes for nanoparticle-based photoacoustic omaging and photothermal therapy, *J. Med. Chem.*, 2021, **64**, 8798-8805.
4. S. G. König and R. Krämer, Accessing structurally diverse near-infrared cyanine dyes for folate receptor-targeted cancer cell staining, *Chem. Eur. J.*, 2017, **23**, 9306-9312.
5. Z. M. Essam, G. E. Ozmen, D. Setiawan, R. R. Hamid, R. M. Abd El-Aal, R. Aneja, D. Hamelberg and M. Henary, Donor acceptor fluorophores: Synthesis, optical properties, TD-DFT and cytotoxicity studies, *Org. Biomol. Chem.*, 2021, **19**, 1835-1846.
6. S. Thavornpradit, S. M. Usama, C. M. Lin and K. Burgess, Protein labelling and albumin binding characteristics of the near-IR Cy7 fluorophore, QuatCy, *Org. Biomol. Chem.*, 2019, **17**, 7150-7154.
7. E. R. Buabeng and M. Henary, 2-((E)-2-((E)-4-Chloro-5-(2-((E)-5-methoxy-3,3-dimethyl-1-(3-phenylpropyl)indolin-2-ylidene)ethylidene)-1,1-dimethyl-1,2,5,6-tetrahydropyridin-1-ium-3-yl)vinyl)-5-methoxy-3,3-dimethyl-1-(3-phenylpropyl)-3H-indol-1-ium., *Molbank*, 2021, **3**, M1270.
